# Supplementary material for: Probing the structural transformation and bonding of metal–boride clusters MB3 (M = La, Ta, Re, Ir)
Source: Royal Society of Chemistry journal article supplement (doi:10.1039/d4cp04358h), 2025-01-01
Supplement: d4cp04358h2.pdf [file d4cp04358h2.pdf]

## Supporting Information

### Probing the Structural Transformation and Bonding of Metal-Boride Clusters $MB_3$ (M = La, Ta, Re, Ir)

Xue-Lian Jiang<sup>a</sup>, Xin-Ran Dong<sup>a</sup>, Cong-Qiao Xu<sup>a,\*</sup>, Jun Li<sup>a, b, c\*</sup>

<sup>a</sup> Department of Chemistry and Guangdong Provincial Key Laboratory of Catalytic Chemistry, Southern University of Science and Technology, Shenzhen, 518055, China.

<sup>b</sup> Department of Chemistry and Engineering Research Center of Advanced Rare-Earth Materials of Ministry of Education, Tsinghua University, Beijing 100084, China

<sup>c</sup> Fundamental Science Center of Rare Earths, Ganjiang Innovation Academy, Chinese Academy of Sciences, Ganzhou 341000, China

\* Corresponding authors: xucq@sustech.edu.cn (C.Q.X.); junli@tsinghua.edu.cn (J.L.)

## Geometric Structure Determination.

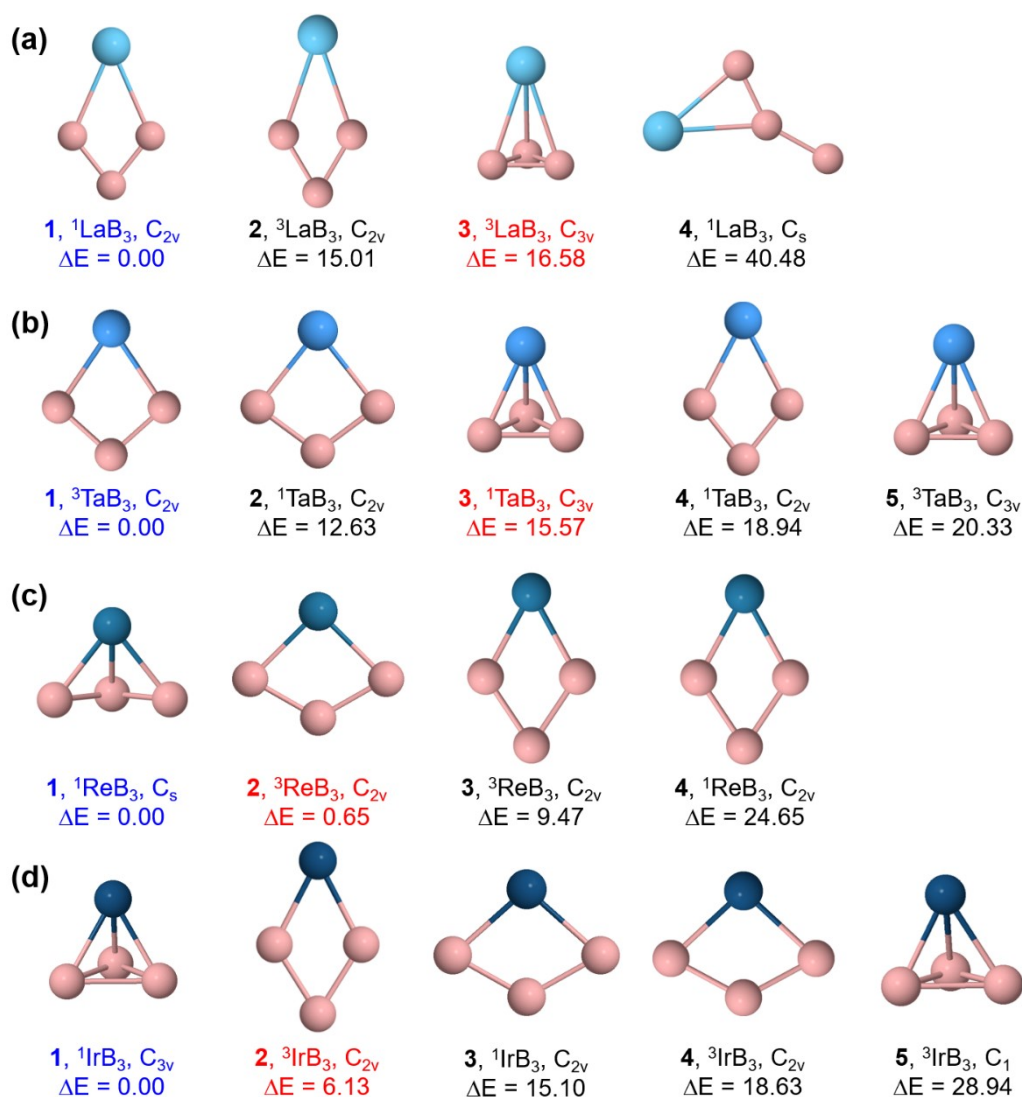

**Fig. S1** The calculated lowest-energy structures and lower-lying states of neutral  $\text{MB}_3$  ( $\text{M} = \text{La}, \text{Ta}, \text{Re}, \text{Ir}$ ) clusters from the TGMIn calculation at the PBE/def2-TZVP level of theory: (a)  $\text{LaB}_3$ , (b)  $\text{TaB}_3$ , (c)  $\text{ReB}_3$ , (d)  $\text{IrB}_3$ . The relative energies ( $\Delta E$ ) with respect to the ground state are shown in kcal/mol. The spin multiplicities are denoted as superscripts. The ground-state structures and the lower-lying states related to the  $2\text{D} \leftrightarrow 3\text{D}$  transformation are labeled in blue and red, respectively.

**Table S1.** The Absolute Binding Energies (Relative to Atoms) of the Selected Isomers for MB<sub>3</sub> (M= La, Ta, Re, Ir) Clusters at the PBE, B3LYP, B3LYP-D3BJ and CCSD(T) Levels. The Values for the Lowest-Lying Structures are Labeled in Bold Black Font. The Isomers are Responding to the Highlighted Ones in **Fig. S1**.

| PBE (Energies are in kcal/mol)   |                                                  |                                                  | CCSD(T) (Energies are in hartree)     |                                                  |                                                  |
|----------------------------------|--------------------------------------------------|--------------------------------------------------|---------------------------------------|--------------------------------------------------|--------------------------------------------------|
| M                                | 2D                                               | 3D                                               | M                                     | 2D                                               | 3D                                               |
| La                               | <b>-384.58</b>                                   | -366.39                                          | La                                    | <b>-105.5746</b>                                 | -105.5412                                        |
|                                  | <b>C<sub>2v</sub>, <sup>1</sup>A<sub>1</sub></b> | C <sub>3v</sub> , <sup>3</sup> A <sub>1</sub>    |                                       | <b>C<sub>2v</sub>, <sup>1</sup>A<sub>1</sub></b> | C <sub>3v</sub> , <sup>3</sup> A <sub>1</sub>    |
| Ta                               | <b>-420.49</b>                                   | -405.89                                          | Ta                                    | <b>-130.8276</b>                                 | -130.8625                                        |
|                                  | <b>C<sub>2v</sub>, <sup>3</sup>A<sub>2</sub></b> | C <sub>3v</sub> , <sup>1</sup> A <sub>1</sub>    |                                       | <b>C<sub>2v</sub>, <sup>3</sup>A<sub>2</sub></b> | C <sub>3v</sub> , <sup>1</sup> A <sub>1</sub>    |
| Re                               | -457.84                                          | <b>-459.58</b>                                   | Re                                    | -152.1553                                        | <b>-152.1727</b>                                 |
|                                  | C <sub>2v</sub> , <sup>3</sup> B <sub>2</sub>    | <b>C<sub>s</sub>, <sup>1</sup>A'</b>             |                                       | C <sub>2v</sub> , <sup>3</sup> B <sub>2</sub>    | <b>C<sub>s</sub>, <sup>1</sup>A'</b>             |
| Ir                               | -452.55                                          | <b>-459.37</b>                                   | Ir                                    | -178.2397                                        | <b>-178.2659</b>                                 |
|                                  | C <sub>2v</sub> , <sup>3</sup> B <sub>1</sub>    | <b>C<sub>3v</sub>, <sup>1</sup>A<sub>1</sub></b> |                                       | C <sub>2v</sub> , <sup>3</sup> B <sub>1</sub>    | <b>C<sub>3v</sub>, <sup>1</sup>A<sub>1</sub></b> |
| B3LYP (Energies are in kcal/mol) |                                                  |                                                  | B3LYP-D3BJ (Energies are in kcal/mol) |                                                  |                                                  |
| M                                | 2D                                               | 3D                                               | M                                     | 2D                                               | 3D                                               |
| La                               | <b>-402.43</b>                                   | -380.71                                          | La                                    | <b>-408.26</b>                                   | -385.16                                          |
|                                  | <b>C<sub>2v</sub>, <sup>1</sup>A<sub>1</sub></b> | C <sub>3v</sub> , <sup>3</sup> A <sub>1</sub>    |                                       | <b>C<sub>2v</sub>, <sup>1</sup>A<sub>1</sub></b> | C <sub>3v</sub> , <sup>3</sup> A <sub>1</sub>    |
| Ta                               | <b>-466.66</b>                                   | -444.59                                          | Ta                                    | <b>-472.31</b>                                   | -448.91                                          |
|                                  | <b>C<sub>2v</sub>, <sup>3</sup>A<sub>2</sub></b> | C <sub>3v</sub> , <sup>1</sup> A <sub>1</sub>    |                                       | <b>C<sub>2v</sub>, <sup>3</sup>A<sub>2</sub></b> | C <sub>3v</sub> , <sup>1</sup> A <sub>1</sub>    |
| Re                               | -523.89                                          | <b>-519.55</b>                                   | Re                                    | -529.91                                          | <b>-525.56</b>                                   |
|                                  | C <sub>2v</sub> , <sup>3</sup> B <sub>2</sub>    | <b>C<sub>s</sub>, <sup>1</sup>A'</b>             |                                       | C <sub>2v</sub> , <sup>3</sup> B <sub>2</sub>    | <b>C<sub>s</sub>, <sup>1</sup>A'</b>             |
| Ir                               | -511.23                                          | <b>-511.93</b>                                   | Ir                                    | -516.34                                          | <b>-517.49</b>                                   |
|                                  | C <sub>2v</sub> , <sup>3</sup> B <sub>1</sub>    | <b>C<sub>3v</sub>, <sup>1</sup>A<sub>1</sub></b> |                                       | C <sub>2v</sub> , <sup>3</sup> B <sub>1</sub>    | <b>C<sub>3v</sub>, <sup>1</sup>A<sub>1</sub></b> |

**Table S2.** The Bond Lengths (in Å) of the Lowest-Lying Isomers for MB<sub>3</sub> (M = La, Ta, Re, Ir) Clusters at the B3LYP and B3LYP-D3BJ Level. The Theoretical (Sum of Pyykkö's Covalent Atomic Radii) Single-Bond Lengths are Listed in Parentheses.

| B3LYP      |    |                                               |                               |                               |
|------------|----|-----------------------------------------------|-------------------------------|-------------------------------|
| Species    | TM | Sym, State                                    | TM-B/ Å                       | B-B/ Å                        |
| 2D         | La | C <sub>2v</sub> , <sup>1</sup> A <sub>1</sub> | 2.35(2.65)                    | 1.53(1.70)                    |
|            | Ta | C <sub>2v</sub> , <sup>3</sup> A <sub>2</sub> | 2.04(2.31)                    | 1.52(1.70)                    |
| 3D         | Re | C <sub>s</sub> , <sup>1</sup> A'              | 1.89 <sup>a</sup> /1.95(2.16) | 1.65 <sup>b</sup> /2.37(1.70) |
|            | Ir | C <sub>3v</sub> , <sup>1</sup> A <sub>1</sub> | 1.87(2.07)                    | 1.93(1.70)                    |
| B3LYP-D3BJ |    |                                               |                               |                               |
| Species    | TM | Sym, State                                    | TM-B/ Å                       | B-B/ Å                        |
| 2D         | La | C <sub>2v</sub> , <sup>1</sup> A <sub>1</sub> | 2.36                          | 1.53                          |
|            | Ta | C <sub>2v</sub> , <sup>3</sup> A <sub>2</sub> | 2.04                          | 1.53                          |
| 3D         | Re | C <sub>s</sub> , <sup>1</sup> A'              | 1.89 <sup>a</sup> /1.95       | 1.65 <sup>a</sup> /2.37       |
|            | Ir | C <sub>3v</sub> , <sup>1</sup> A <sub>1</sub> | 1.87                          | 2.01                          |

<sup>a</sup> For C<sub>s</sub>-ReB<sub>3</sub>, the bond length of two equivalent Re–B bonds is 1.89 Å while the other one is 1.95 Å.

<sup>b</sup> For C<sub>s</sub>-ReB<sub>3</sub>, the bond length of two equivalent B–B bonds is 1.65 Å while the other one is 2.37 Å.

**Table S3.** The Bond Orders (in Å) of the Lowest-Lying Isomers for MB<sub>3</sub> (M= La, Ta, Re, Ir) Clusters at the B3LYP Level.

| Species | Cluster          | Sym,<br>State                                    | Mayer                   |                         | G-J                     |                         | N-M (1)                 |                         |
|---------|------------------|--------------------------------------------------|-------------------------|-------------------------|-------------------------|-------------------------|-------------------------|-------------------------|
|         |                  |                                                  | TM-B                    | B-B                     | TM-B                    | B-B                     | TM-B                    | B-B                     |
| 2D      | LaB <sub>3</sub> | C <sub>2v</sub> ,<br><sup>1</sup> A <sub>1</sub> | 1.42                    | 1.40                    | 1.36                    | 1.53                    | 1.52                    | 1.48                    |
|         | TaB <sub>3</sub> | C <sub>2v</sub> ,<br><sup>3</sup> A <sub>2</sub> | 1.66                    | 1.36                    | 1.62                    | 1.49                    | 1.75                    | 1.44                    |
| 3D      | ReB <sub>3</sub> | C <sub>s</sub> ,<br><sup>1</sup> A'              | 1.92 <sup>a</sup> /1.59 | 0.98 <sup>b</sup> /0.28 | 1.88 <sup>a</sup> /1.39 | 1.18 <sup>b</sup> /0.34 | 2.01 <sup>a</sup> /1.51 | 1.08 <sup>b</sup> /0.30 |
|         | IrB <sub>3</sub> | C <sub>3v</sub> ,<br><sup>1</sup> A <sub>1</sub> | 1.63                    | 0.63                    | 1.40                    | 0.97                    | 1.50                    | 0.85                    |

<sup>a</sup> For C<sub>s</sub>-ReB<sub>3</sub>, the bond orders of two equivalent Re-B bonds is larger while the other one is smaller.

<sup>b</sup> For C<sub>s</sub>-ReB<sub>3</sub>, the bond orders of two equivalent B-B bonds is larger while the other one is smaller.

**Table S4.** Computed Atomic Charges of the Lowest-Lying Isomers for MB<sub>3</sub> (M = La, Ta, Re, Ir) Clusters with Various Charge Partition Schemes at the B3LYP Level.

| Species | Cluster          | Sym,<br>State                                 | Mulliken |                                        | Hirshfield |                                        | VDD  |                                        |
|---------|------------------|-----------------------------------------------|----------|----------------------------------------|------------|----------------------------------------|------|----------------------------------------|
|         |                  |                                               | M        | B                                      | M          | B                                      | M    | B                                      |
| 2D      | LaB <sub>3</sub> | C <sub>2v</sub> , <sup>1</sup> A <sub>1</sub> | 0.35     | -0.10 <sup>a</sup> /-0.15 <sup>b</sup> | 0.68       | -0.27 <sup>a</sup> /-0.14 <sup>b</sup> | 0.77 | -0.32 <sup>a</sup> /-0.14 <sup>b</sup> |
|         | TaB <sub>3</sub> | C <sub>2v</sub> , <sup>3</sup> A <sub>2</sub> | 0.27     | -0.16 <sup>a</sup> /0.03 <sup>b</sup>  | 0.36       | -0.14 <sup>a</sup> /-0.08 <sup>b</sup> | 0.50 | -0.21 <sup>a</sup> /-0.08 <sup>b</sup> |
| 3D      | ReB <sub>3</sub> | C <sub>s</sub> , <sup>1</sup> A'              | 0.18     | -0.05 <sup>a</sup> /-0.08 <sup>b</sup> | 0.17       | -0.06 <sup>a</sup> /-0.05 <sup>b</sup> | 0.33 | -0.12 <sup>a</sup> /-0.11 <sup>b</sup> |
|         | IrB <sub>3</sub> | C <sub>3v</sub> , <sup>1</sup> A <sub>1</sub> | 0.17     | -0.06                                  | 0.08       | -0.03                                  | 0.21 | -0.07                                  |

<sup>a</sup> For the species, the atomic charges of two equivalent B atoms

<sup>b</sup> For the species, the atomic charges of other B atoms

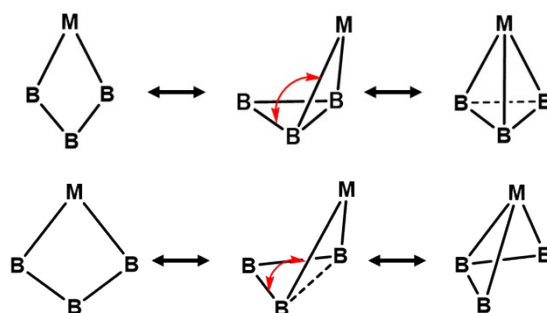

**Scheme S1.** Structural rearrangement between the 2D planar structure with  $C_{2v}$  symmetry and *top*: the 3D triangular pyramid geometry with  $C_{3v}$  symmetry or *bottom*: the 3D near-triangular pyramid geometry with  $C_s$  symmetry, by changing the dihedral angles ( $\theta$ , in red) between metals and  $B_3$  moieties.

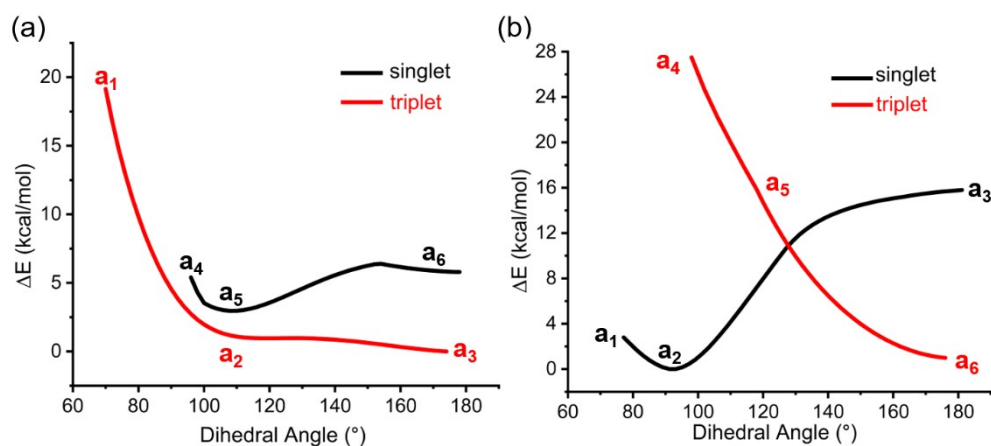

**Fig. S2** Linear synchronous transit (LST) curves for structural transformation process with respect to the dihedral angles between metal atoms of (a) Ta, (b) Re and  $B_3$  moiety at the PBE/def2-SVP level. The energy of each ground state is taken to be zero. Note: the transformation direction from left to right represents the geometric change from triangular pyramid (3D species) to planar (2D species) structure. The annotated geometries along the LST curves are provided in Fig. S3. The black line indicates the PES of the singlet state, whereas the red line depicts the PES of the triplet state.

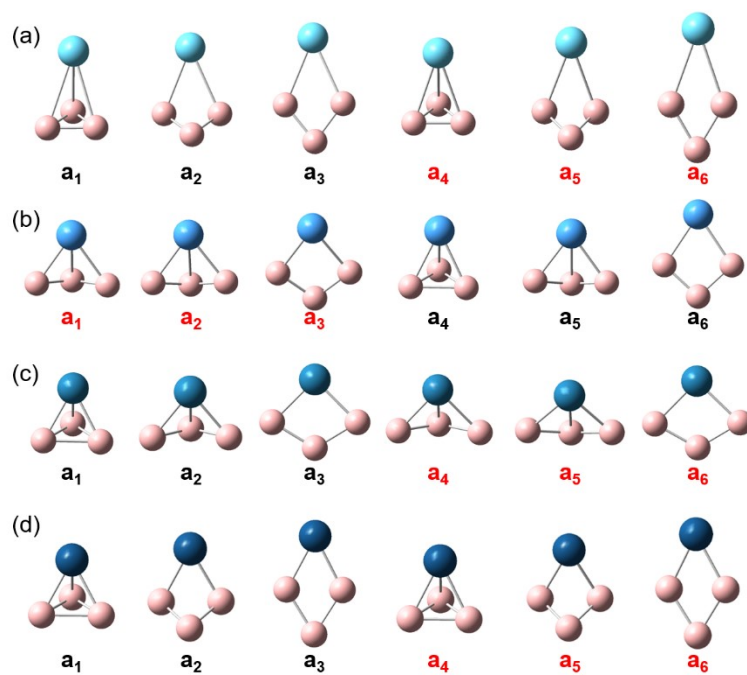

**Fig. S3** The geometries along the LST curves for structural transformation process of **(a)**  $\text{LaB}_3$ , **(b)**  $\text{TaB}_3$ , **(c)**  $\text{ReB}_3$ , **(d)**  $\text{IrB}_3$  in Fig. 2 and Fig. S2.

## MO Analysis.

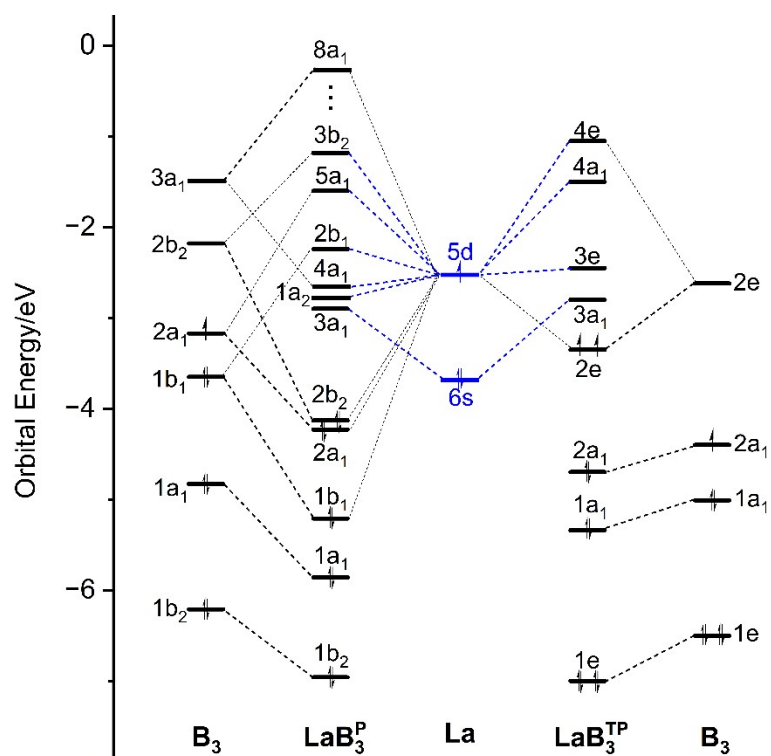

**Fig. S4** Comparison of the Kohn-Sham molecular orbital energy levels between the 2D planar (*left*,  $C_{2v}$  symmetry) and 3D triangular pyramid (*right*,  $C_{3v}$  symmetry)  $\text{LaB}_3$  isomers, using the fragments of La and  $\text{B}_3$ .



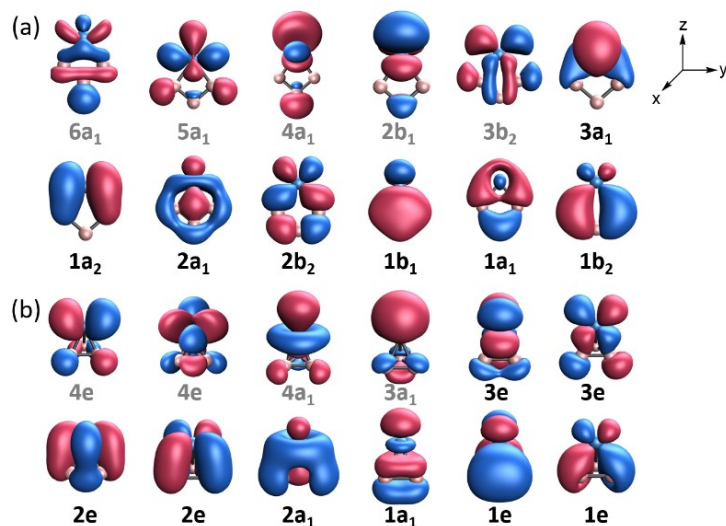

**Fig. S5** Comparison of the Kohn-Sham MO contours between **(a)** 2D planar ( $C_{2v}$  symmetry) and **(b)** 3D triangular pyramid ( $C_{3v}$  symmetry)  $TaB_3$  isomers. The occupied MOs are labeled in black and the empty orbitals in grey.

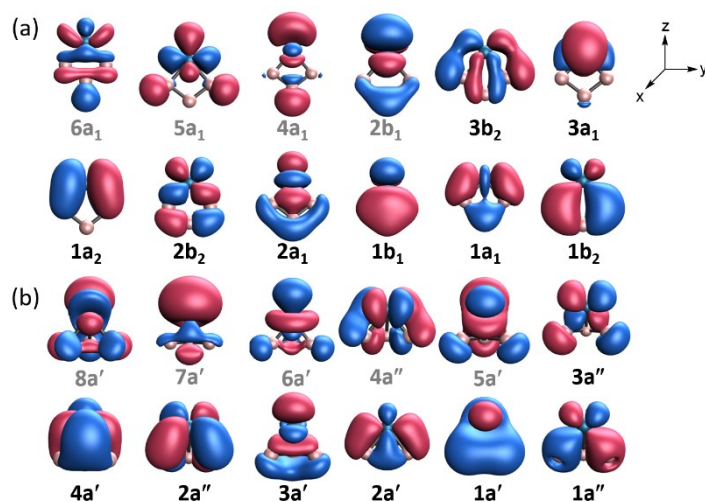

**Fig. S6** Comparison of the Kohn-Sham MO contours between **(a)** 2D planar ( $C_{2v}$  symmetry) and **(b)** 3D triangular pyramid ( $C_{3v}$  symmetry)  $ReB_3$  isomers. The occupied MOs are labeled in black and the empty orbitals in grey.

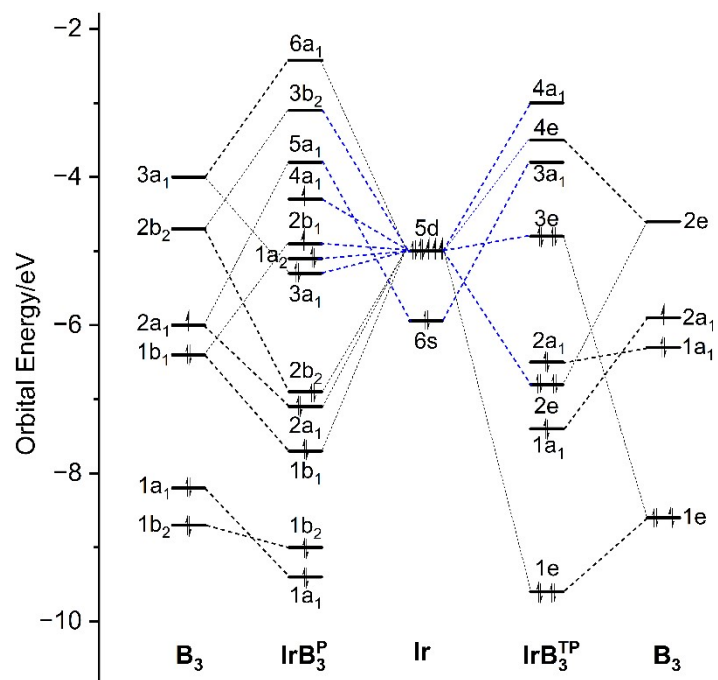

**Fig. S7** Comparison of the Kohn-Sham molecular orbital energy levels between the 2D planar (*left*,  $C_{2v}$  symmetry) and 3D triangular pyramid (*right*,  $C_{3v}$  symmetry)  $\text{IrB}_3$  isomers, using the fragments of Ir and  $\text{B}_3$ .

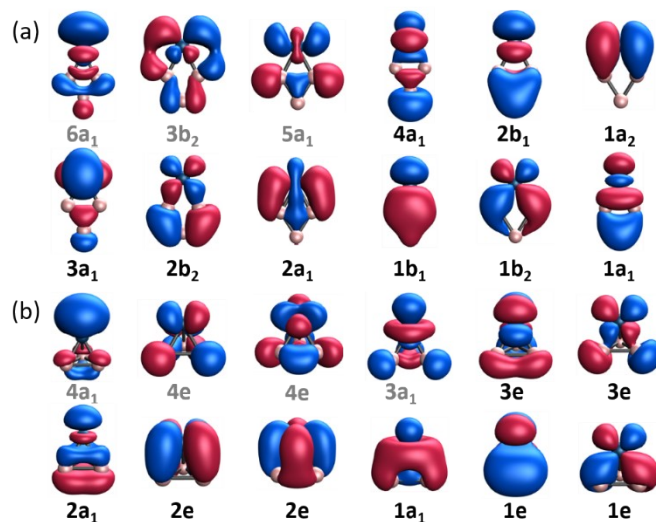

**Fig. S8** Comparison of the Kohn-Sham MO contours between **(a)** 2D planar ( $C_{2v}$  symmetry) and **(b)** 3D triangular pyramid ( $C_{3v}$  symmetry)  $\text{IrB}_3$  isomers. The occupied MOs are labeled in black and the empty orbitals in grey. The related energy levels are shown in **Fig. S3**.

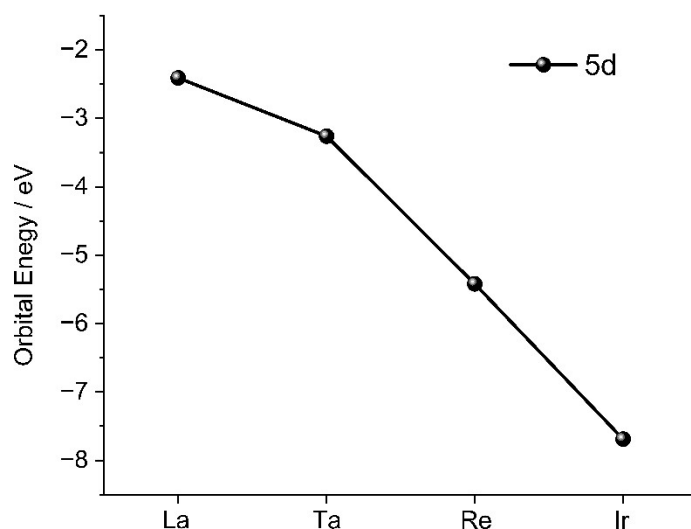

**Fig. S9** The energy of the valence 5d orbitals for La-Ir at the B3LYP/TZ2P level.

**Table S5.** EDA results for  $\text{LaB}_3$  and  $\text{IrB}_3$  molecules at the B3LYP/TZP Level, with different fragmental charge repartition.

| Energy term                | $\text{LaB}_3$                     |                                    | $\text{IrB}_3$                     |                                    |
|----------------------------|------------------------------------|------------------------------------|------------------------------------|------------------------------------|
|                            | $\text{La}^{3+} + \text{B}_3^{3-}$ | $\text{La}^{1-} + \text{B}_3^{1+}$ | $\text{Ir}^{3+} + \text{B}_3^{3-}$ | $\text{Ir}^{1-} + \text{B}_3^{1+}$ |
| $\Delta E_{\text{int}}$    | -1210.00                           | -381.35                            | -1896.42                           | -428.88                            |
| $\Delta E_{\text{Pauli}}$  | 333.69                             | 434.70                             | 957.95                             | 1208.94                            |
| $\Delta E_{\text{elstat}}$ | -1113.62                           | -241.72                            | -1617.63                           | -861.86                            |
| $\Delta E_{\text{orb}}$    | -430.07                            | -574.33                            | -1236.74                           | -775.96                            |

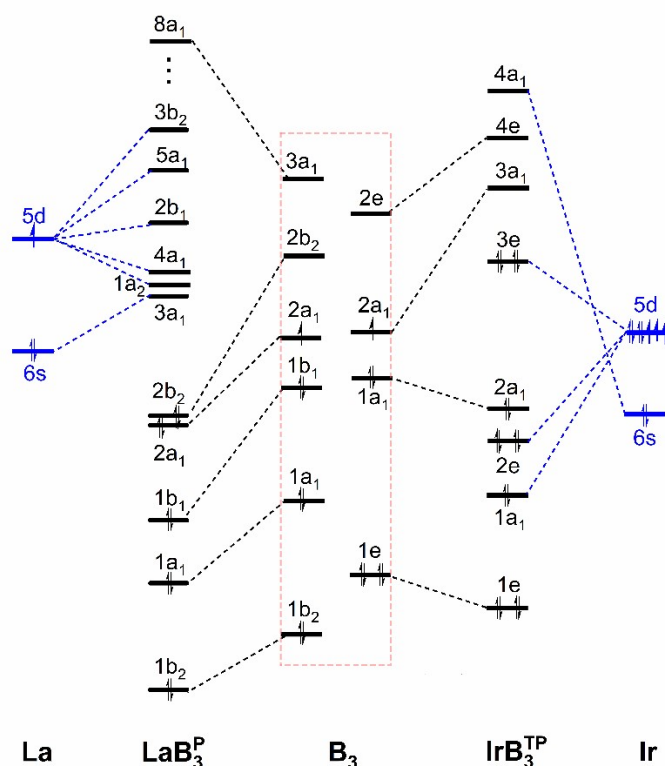

**Fig. S10** Schematic MO energy-level correlation diagram of  $\text{LaB}_3^{\text{P}}$  and  $\text{IrB}_3^{\text{TP}}$  molecules by considering the metal and triboron fragments.

**Table S6.** AO Composition (in %) of the Kohn-Sham Molecular Orbitals for the Lowest-Lying Structures of  $\text{MB}_3$  ( $\text{M} = \text{La}, \text{Ir}$ ) Clusters at the B3LYP/TZ2P Level. The Labels of the MOs are Consistent with that in Fig. 3 and Fig. S4.

| MO                    | $\text{LaB}_3$                                                                                                                      |
|-----------------------|-------------------------------------------------------------------------------------------------------------------------------------|
| <b>3b<sub>2</sub></b> | 40.9%La(5d <sub>yz</sub> ) + 29.8%La(5p) + 29.3%B(2p)                                                                               |
| <b>5a<sub>1</sub></b> | 65.6%La(5d <sub>x<sup>2</sup>-y<sup>2</sup></sub> ) + 9.6%La(5d <sub>z<sup>2</sup></sub> ) + 12.2%La(5p) + 12.6%B(2p)               |
| <b>2b<sub>1</sub></b> | 68.4%La(5d <sub>xz</sub> ) + 16.4%La(5p) + 15.2%B(2p)                                                                               |
| <b>4a<sub>1</sub></b> | 46.9%La(5d <sub>z<sup>2</sup></sub> ) + 3.6%La(5d <sub>x<sup>2</sup>-y<sup>2</sup></sub> ) + 15.5%La(5p) + 9.2%B(2s) + 24.8%B(2p)   |
| <b>1a<sub>2</sub></b> | 88.4%La(5d <sub>xy</sub> ) + 11.6%B(2p)                                                                                             |
| <b>3a<sub>1</sub></b> | 26.8%La(5d <sub>x<sup>2</sup>-y<sup>2</sup></sub> ) + 5.3%La(5d <sub>z<sup>2</sup></sub> ) + 37.1%La(6s) + 20.0%La(5p) + 10.8%B(2p) |
| <b>2b<sub>2</sub></b> | 36.9%La(5d <sub>yz</sub> ) + 2.0%B(2s) + 61.1%B(2p)                                                                                 |
| <b>2a<sub>1</sub></b> | 2.2%La(5d <sub>z<sup>2</sup></sub> ) + 4.9%La(5d <sub>x<sup>2</sup>-y<sup>2</sup></sub> ) + 24.0%La(6s) + 15.4%B(2s) + 53.5%B(2p)   |
| <b>1b<sub>1</sub></b> | 21.7%La(5d <sub>xz</sub> ) + 78.3%B(2p)                                                                                             |

|                       |                                                                                                                    |
|-----------------------|--------------------------------------------------------------------------------------------------------------------|
| <b>1a<sub>1</sub></b> | 13.9%La(5d <sub>z2</sub> ) + 8.0%La(6s) + 32.9%B(2s) + 45.2%B(2p)                                                  |
| <b>1b<sub>2</sub></b> | 10.5%La(5d <sub>yz</sub> ) + 56.5%B(2s) + 33%B(2p)                                                                 |
| <b>MO</b>             | <b>TaB<sub>3</sub></b>                                                                                             |
| <b>6a<sub>1</sub></b> | 33.4% Ta(5d <sub>z2</sub> ) + 17.2%Ta(5d <sub>x2-y2</sub> ) + 12.0% B(2s) + 37.4%B(2p)                             |
| <b>5a<sub>1</sub></b> | 26.8% Ta(5d <sub>yz</sub> ) + 8.8%Ta(6p) + 6.1%B(2s) + 58.3%B(2p)                                                  |
| <b>2b<sub>1</sub></b> | 58.2%Ta(5d <sub>xz</sub> ) + 16.3%Ta(6p) + 25.5%B(2p)                                                              |
| <b>4a<sub>1</sub></b> | 26.4%Ta(5d <sub>z2</sub> ) + 10.7%Ta(5d <sub>x2-y2</sub> ) + 30.4%Ta(6p/7s) +10.2%B(2s)+ 22.3%B(2p)                |
| <b>3b<sub>2</sub></b> | 25.0%Ta(5d <sub>yz</sub> ) + 12.2%Ta(6p) + 6.9%B(2s) + 55.9%B(2p)                                                  |
| <b>3a<sub>1</sub></b> | 56.0%Ta(5d <sub>x2-y2</sub> ) +3.4%Ta(5d <sub>z2</sub> ) +33.3%Ta(6s) +3.2%B(2s) +4.1%B(2p)                        |
| <b>1a<sub>2</sub></b> | 82.4%Ta(5d <sub>xy</sub> ) +17.6%B(2p)                                                                             |
| <b>2a<sub>1</sub></b> | 28.5% Ta(5d <sub>z2</sub> ) + 4.0%Ta(6s) +21.0%B(2s) + 46.5%B(2p)                                                  |
| <b>1b<sub>1</sub></b> | 30.8% Ta(5d <sub>xz</sub> ) + 3.1%Ta(6p) + 66.1%B(2p)                                                              |
| <b>2b<sub>2</sub></b> | 33.4%Ta(5d <sub>yz</sub> ) + 66.6%B(2p)                                                                            |
| <b>1a<sub>1</sub></b> | 4.5% Ta(5d <sub>x2-y2</sub> ) + 29.5%Ta(6s) + 24.7%B(2s) + 41.3%B(2p)                                              |
| <b>1b<sub>2</sub></b> | 15.8% Ta(5d <sub>yz</sub> ) + 3.1% Ta(6p) + 58.2%B(2s) + 22.9%B(2p)                                                |
| <b>MO</b>             | <b>ReB<sub>3</sub></b>                                                                                             |
| <b>5a''</b>           | 16.6%Re(5d <sub>xz</sub> ) + 9.9% Re(5d <sub>yz</sub> ) + 4.3%Re(6p) + 69.2%B(2p)                                  |
| <b>7a'</b>            | 16.2%Re(5d <sub>z2/x2-y2</sub> ) + 6.1% Re(5d <sub>xy</sub> ) + 14.5%Re(6s) + 7.8%B(2s) +                          |
| <b>6a'</b>            | 23.9%Re(5d <sub>x2-y2</sub> ) + 5.3% Re(5d <sub>z2</sub> ) + 6.9%Re(6p) + 14.8%Re(7s) + 49.1%B(2p)                 |
| <b>4a''</b>           | 34.2%Re(5d <sub>yz</sub> ) + 5.7%Re(6p) + 2.0%B(2s) + 58.1%B(2p)                                                   |
| <b>5a'</b>            | 31.0%Re(5d <sub>xy</sub> ) + 5.4%Re(5d <sub>z2/x2-y2</sub> ) + 22.0%B(2s) + 41.6%B(2p)                             |
| <b>3a''</b>           | 25.1%Re(5d <sub>xz</sub> ) + 12.8% Re(5d <sub>yz</sub> ) + 28.3%B(2s) + 33.8%B(2p)                                 |
| <b>4a'</b>            | 36.5%Re(5d <sub>z2</sub> ) + 22.6%Re(5d <sub>x2-y2</sub> ) + 4.4%Re(5d <sub>xy</sub> ) + 19.7% Re(6s) + 16.8%B(2p) |
| <b>2a''</b>           | 40.9%Re(5d <sub>yz</sub> ) + 11.5%Re(5d <sub>xz</sub> ) + 47.6%B(2p)                                               |
| <b>3a'</b>            | 13.8%Re(5d <sub>x2-y2</sub> ) + 6.2%Re(5d <sub>xy</sub> ) + 4.7%Re(6s) + 19.5%B(2s) + 55.8%B(2p)                   |
| <b>2a'</b>            | 25.8%Re(5d <sub>z2</sub> ) + 11.3%Re(5d <sub>xy/x2-y2</sub> ) + 13.2%Re(6s) + 8.6%B(2s) + 41.1%B(2p)               |
| <b>1a'</b>            | 32.5%Re(5d <sub>xy</sub> ) + 7.8%Re(5d <sub>z2/x2-y2</sub> ) + 4.3%Re(6s) + 30.7%B(2s) + 24.7%B(2p)                |
| <b>1a''</b>           | 30.7%Re(5d <sub>xz</sub> ) + 44.1%B(2s) + 17.1%B(2p)                                                               |
| <b>MO</b>             | <b>IrB<sub>3</sub></b>                                                                                             |
| <b>4e</b>             | 19.5%Ir(5d <sub>x2-y2/xz/yz</sub> ) + 4.1%B(2s) + 76.4%B(2p)                                                       |
| <b>4a<sub>1</sub></b> | 16.3%Ir(5d <sub>z2</sub> ) + 58.2%Ir(6s) + 5.1%B(2s) + 20.4%B(2p)                                                  |
| <b>3a<sub>1</sub></b> | 40.0%Ir(5d <sub>z2</sub> ) + 16.1%Ir(6s) + 5.7%B(2s) + 38.2%B(2p)                                                  |
| <b>3e</b>             | 30.7%Ir(5d <sub>xz/yz</sub> ) + 40.0%B(2s) + 29.3%B(2p)                                                            |
| <b>2e</b>             | 79.3%Ir(5d <sub>x2-y2/xy</sub> ) + 20.7%B(2p)                                                                      |

**2a<sub>1</sub>** 4.1%Ir(5d<sub>z<sup>2</sup></sub>) + 22.5%Ir(6s) + 13.8%B(2s) + 59.6%B(2p)

**1a<sub>1</sub>** 50.8%Ir(5d<sub>z<sup>2</sup></sub>) + 12.6%Ir(6s) + 19.2%B(2s) + 17.4%B(2p)

**1e** 53.9%Ir(5d<sub>xz/yz</sub>) + 29.0%B(2s) + 17.1%B(2p)

---

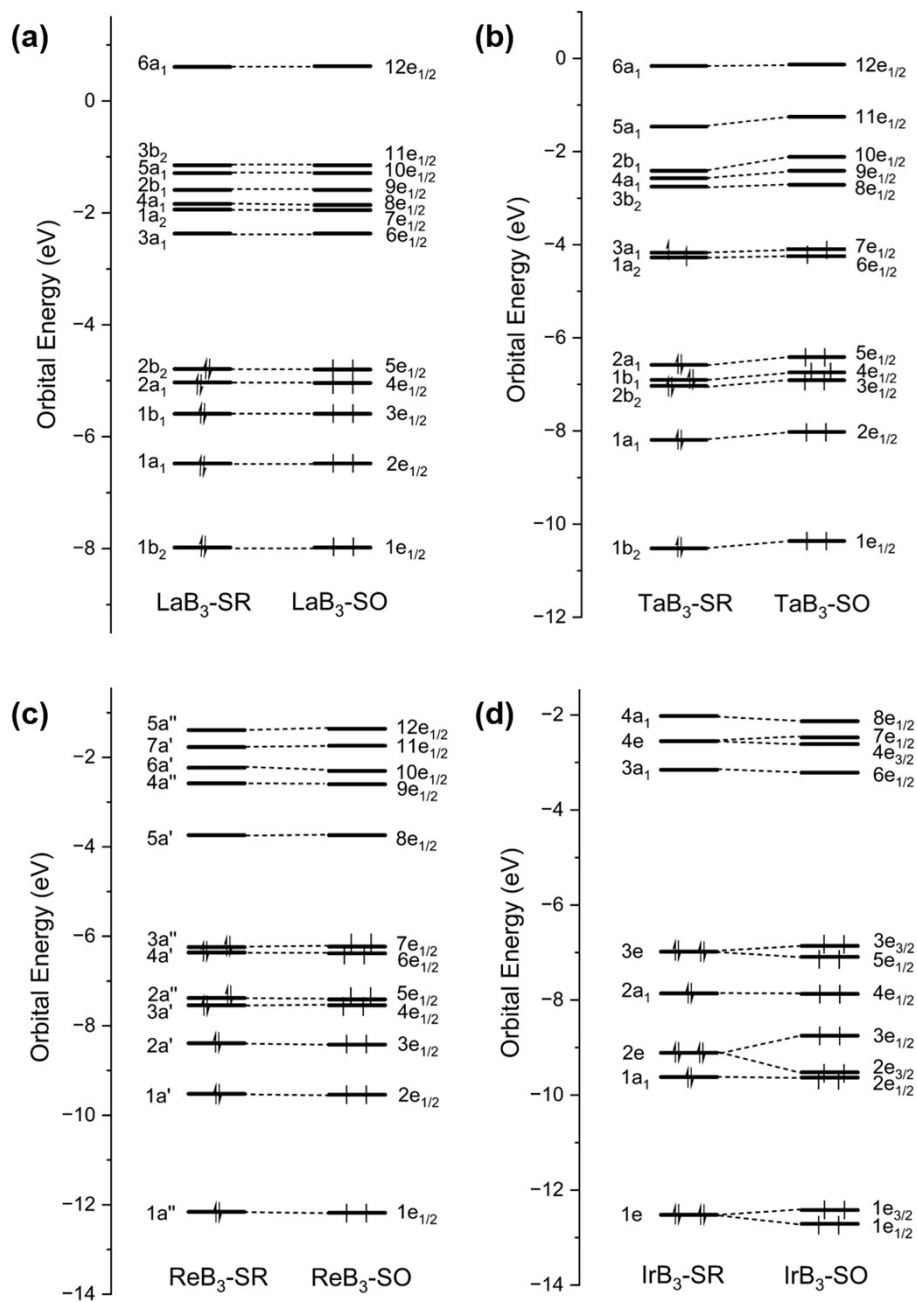

**Fig. S11** Occupied and virtual Kohn-Sham molecular orbital energies (in eV) of the lowest-lying isomers for  $\text{MB}_3$  ( $M = \text{La}, \text{Ta}, \text{Re}, \text{Ir}$ ) (SR- and SO-ZORA/DFT/B3LYP).

## Chemical Bonding Analysis.

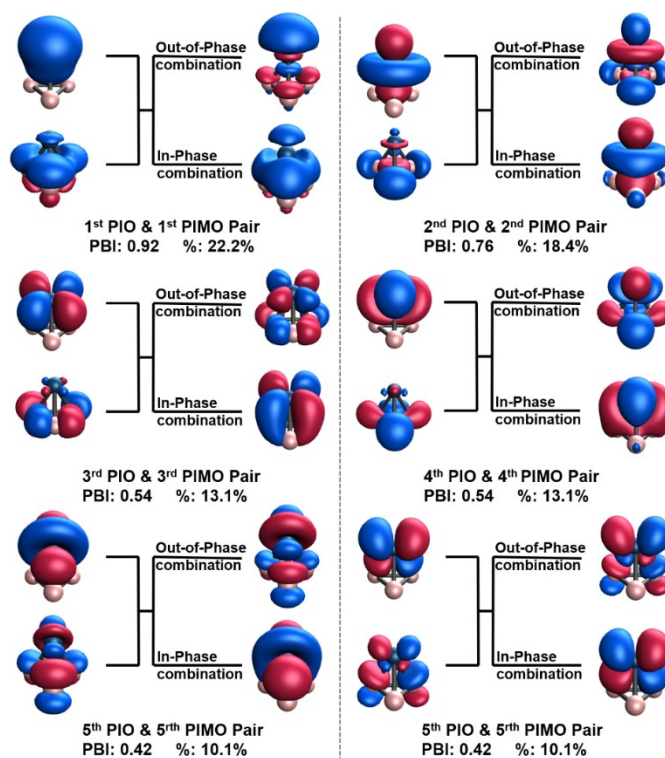

**Fig. S12** Results of PIO analysis for the ground state of  $\text{IrB}_3$  with Ir and  $\text{B}_3$  as two neutral fragments. Six PIMO pairs and their relationship with PIO pairs are shown, with the PIO-based bond indices (abbreviated as PBI) and its contribution (as %) to the total interactions between two fragments given below each PIMO pair. The other minority of bonding interactions are not shown.



**Table S7.** QAIM Local and Integral Properties corresponding to **Fig. 7** at the DFT/PBE Level: Electron Density  $\rho$  (in a.u.), Density Laplacian  $\nabla^2\rho_b$  (in a.u.), Energy-Density H (in a.u.) and Bond Ellipticity  $\varepsilon$  for  $MB_3$  ( $M = \text{La, Ta, Re and Ir}$ ) Clusters. The Values for the Lowest-Lying Structures are Labeled in Bold Black Font.

| Bond                                  | BCP                                   | $\rho$                                     | $\nabla^2\rho_b$                             | H                                            | $\varepsilon$                            |
|---------------------------------------|---------------------------------------|--------------------------------------------|----------------------------------------------|----------------------------------------------|------------------------------------------|
| M-B                                   | <b>LaB<sub>3</sub>-C<sub>2v</sub></b> | <b>0.087</b>                               | <b>0.026</b>                                 | <b>-0.047</b>                                | <b>0.16</b>                              |
|                                       | LaB <sub>3</sub> -C <sub>3v</sub>     | 0.074                                      | 0.118                                        | -0.027                                       | 0.00                                     |
|                                       | <b>TaB<sub>3</sub>-C<sub>2v</sub></b> | <b>0.126</b>                               | <b>0.016</b>                                 | <b>-0.090</b>                                | <b>0.29</b>                              |
|                                       | TaB <sub>3</sub> -C <sub>3v</sub>     | 0.122                                      | 0.109                                        | -0.077                                       | 2.27                                     |
|                                       | ReB <sub>3</sub> -C <sub>2v</sub>     | 0.157                                      | -0.143                                       | -0.162                                       | 0.20                                     |
|                                       | <b>ReB<sub>3</sub>-C<sub>s</sub></b>  | <b>0.164<sup>a</sup>/0.148<sup>b</sup></b> | <b>-0.180<sup>a</sup>/-0.007<sup>b</sup></b> | <b>-0.156<sup>a</sup>/-0.119<sup>b</sup></b> | <b>0.62<sup>a</sup>/0.69<sup>b</sup></b> |
|                                       | IrB <sub>3</sub> -C <sub>2v</sub>     | 0.161                                      | -0.180                                       | -0.152                                       | 0.28                                     |
|                                       | <b>IrB<sub>3</sub>-C<sub>3v</sub></b> | <b>0.157</b>                               | <b>-0.219</b>                                | <b>-0.150</b>                                | <b>0.06</b>                              |
| Bond                                  | BCP                                   | $\rho$                                     | $\nabla^2\rho_b$                             | H                                            | $\varepsilon$                            |
| B-B                                   | B <sub>4</sub>                        | 0.167                                      | -0.324                                       | -0.173                                       | 0.46                                     |
|                                       | <b>LaB<sub>3</sub>-C<sub>2v</sub></b> | <b>0.166</b>                               | <b>-0.324</b>                                | <b>-0.171</b>                                | <b>0.43</b>                              |
|                                       | LaB <sub>3</sub> -C <sub>3v</sub>     | 0.154                                      | -0.136                                       | -0.139                                       | 2.31                                     |
|                                       | <b>TaB<sub>3</sub>-C<sub>2v</sub></b> | <b>0.163</b>                               | <b>-0.332</b>                                | <b>-0.167</b>                                | <b>0.19</b>                              |
|                                       | TaB <sub>3</sub> -C <sub>3v</sub>     | 0.134                                      | -0.084                                       | -0.108                                       | 0.70                                     |
|                                       | ReB <sub>3</sub> -C <sub>2v</sub>     | 0.162                                      | -0.301                                       | -0.132                                       | 0.510.15                                 |
|                                       | <b>ReB<sub>3</sub>-C<sub>s</sub></b>  | \                                          | \                                            | \                                            | \                                        |
|                                       | IrB <sub>3</sub> -C <sub>2v</sub>     | 0.140                                      | -0.196                                       | -0.124                                       | 0.08                                     |
| <b>IrB<sub>3</sub>-C<sub>3v</sub></b> | \                                     | \                                          | \                                            | \                                            |                                          |

<sup>a</sup> For C<sub>s</sub>-ReB<sub>3</sub>, the QAIM Properties of two equivalent Re-B bond

<sup>b</sup> For C<sub>s</sub>-ReB<sub>3</sub>, the QAIM Properties of one longer Re-B bond

## Structural Transformation of MB<sub>3</sub> Clusters along the 5d metals.

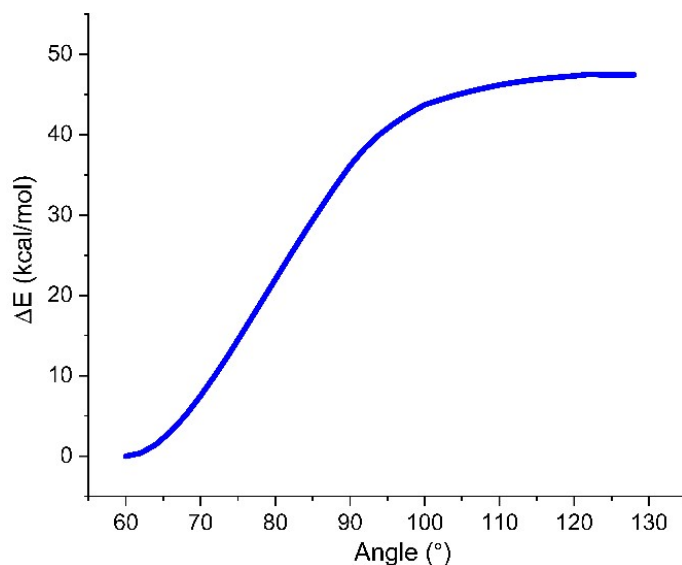

**Fig. S13** LST curves for structural transformation process with respect to the angles between three boron atoms at the PBE/def2-SVP level. Note: the transformation direction from left to right represents the geometric change from C<sub>3v</sub> to C<sub>2v</sub> symmetries.

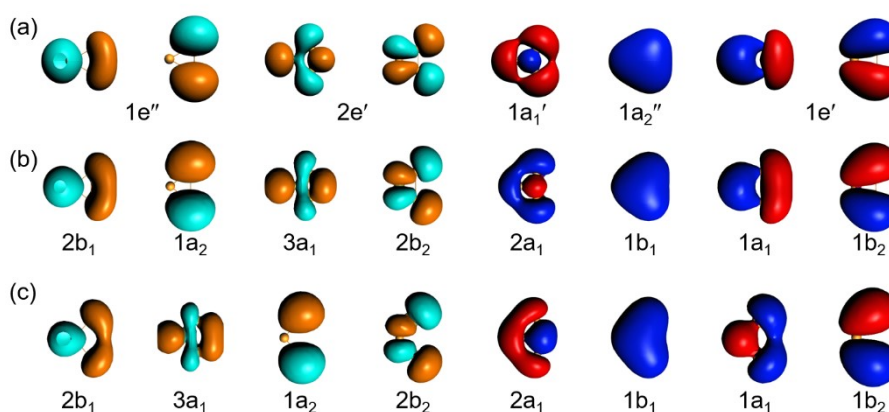

**Fig. S14** Selected canonical molecular orbital (CMO) transition from the triangular B<sub>3</sub> to a ring-opened structure: (a)-(c) represents the canonical molecular orbitals of B<sub>3</sub> units related to geometries in IrB<sub>3</sub>, LaB<sub>3</sub> and TaB<sub>3</sub> molecules, respectively.

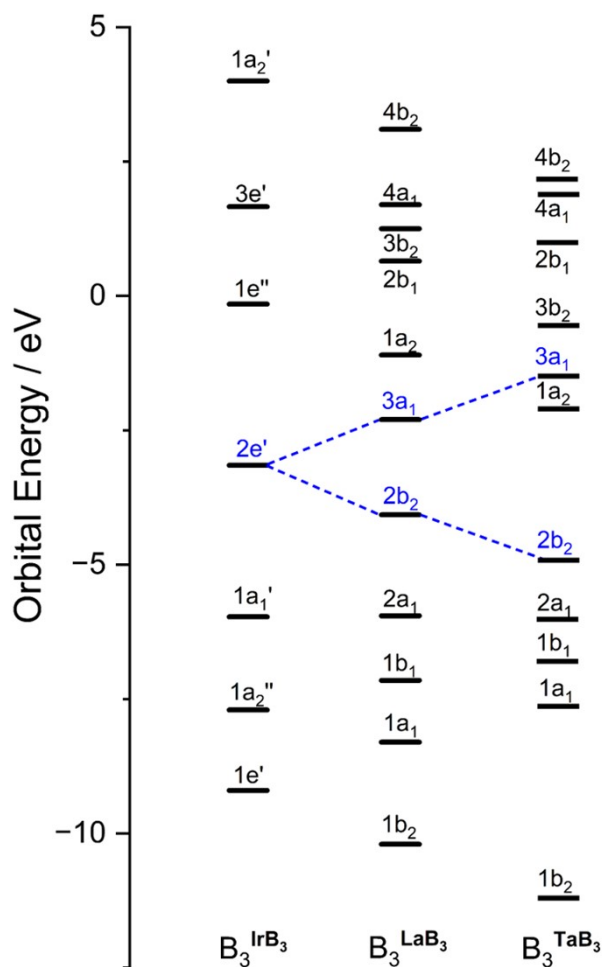

**Fig. S15** The CMO energy levels from the triangular  $B_3$  to a ring-opened structure, where the energy levels of the canonical molecular orbitals for  $B_3^{IrB_3}$ - $B_3^{TaB_3}$  are obtained from single-point calculations of the  $B_3$  units using their corresponding geometries in  $IrB_3$ ,  $LaB_3$  and  $TaB_3$  molecules, respectively.

**Table S8.** Binding Energies ( $E$ , kcal/mol) of the 2D and 3D Geometries of  $MB_3$  ( $M = La, Ta, Re, Ir$ ) Molecules and Energy Changes ( $\Delta E$ , kcal/mol) for 2D $\rightarrow$ 3D transition at the B3LYP/TZ2P level.

| Molecules   | E(2D)   | E(3D)   | $\Delta E(2D\rightarrow 3D)$ |
|-------------|---------|---------|------------------------------|
| ${}^1LaB_3$ | -402.43 | -307.01 | 95.42                        |
| ${}^3TaB_3$ | -466.66 | -438.20 | 28.46                        |
| ${}^1ReB_3$ | -502.59 | -519.55 | -16.96                       |
| ${}^1IrB_3$ | -497.46 | -511.93 | -14.47                       |



between metals and B<sub>3</sub> moieties. The HOMO is plotted in blue. The other structures along the transformation process are distinguished by a superscript asterisk.

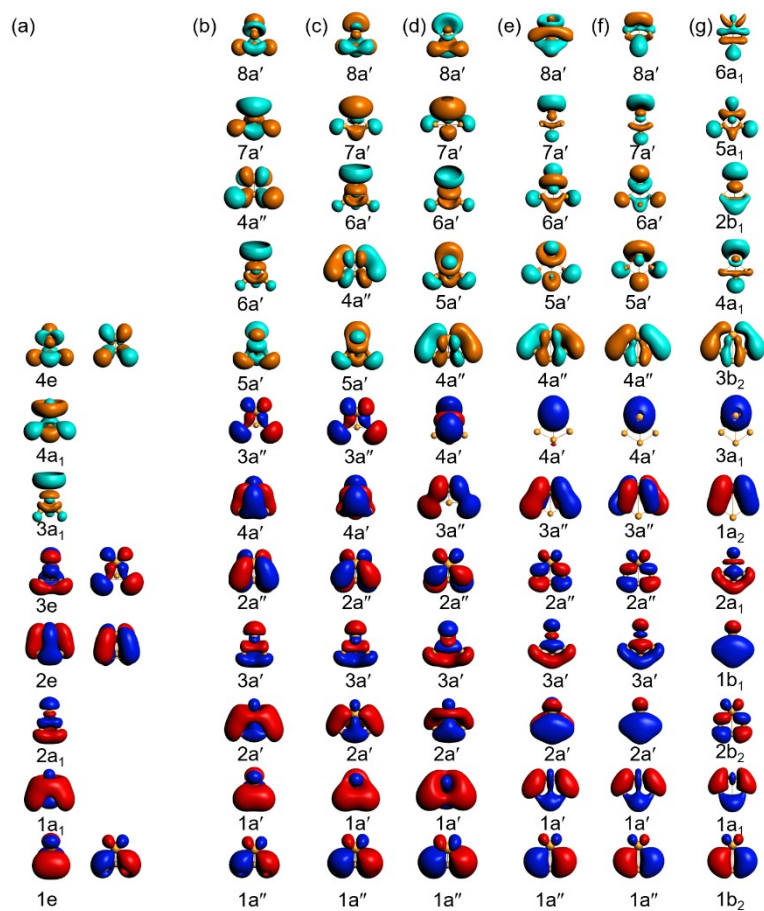

**Fig. S18** The correlation of the CMOs with respect to the irreducible representation along the reaction coordinate, in which the energy levels of these orbitals are shown in Fig. S16.

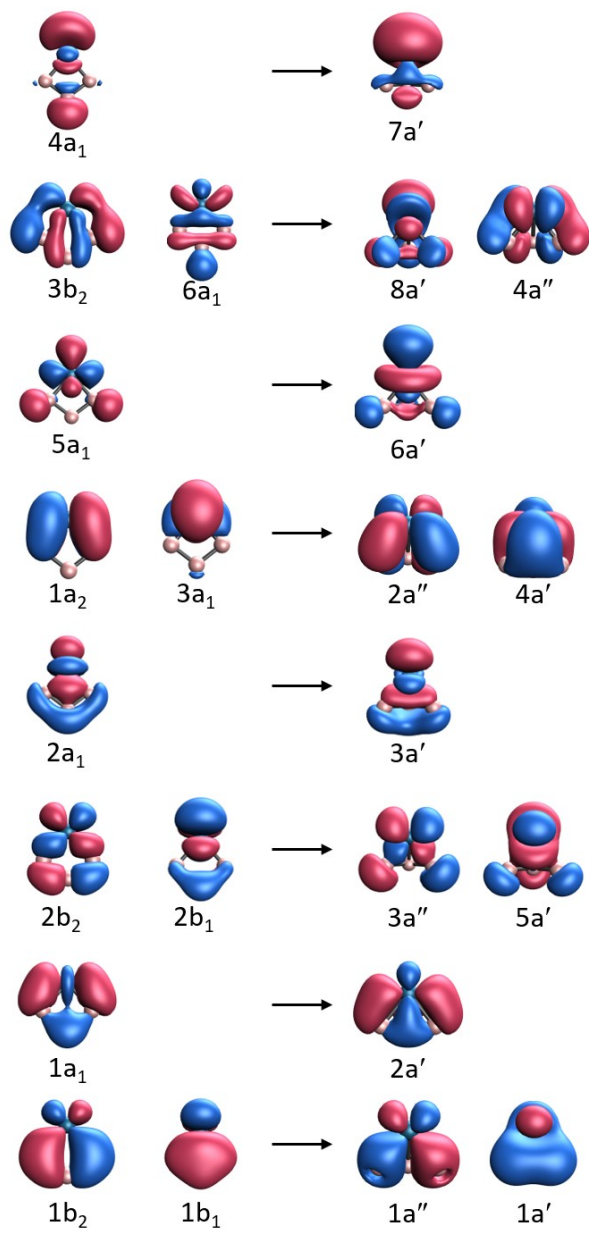

**Fig. S19** The CMO correlation for the structural transformation of  $\text{ReB}_3$  cluster from 2D ( $C_{2v}$  symmetry) to 3D ( $C_s$  symmetry), corresponding to the energy-level correlation in **Fig. 5a**.

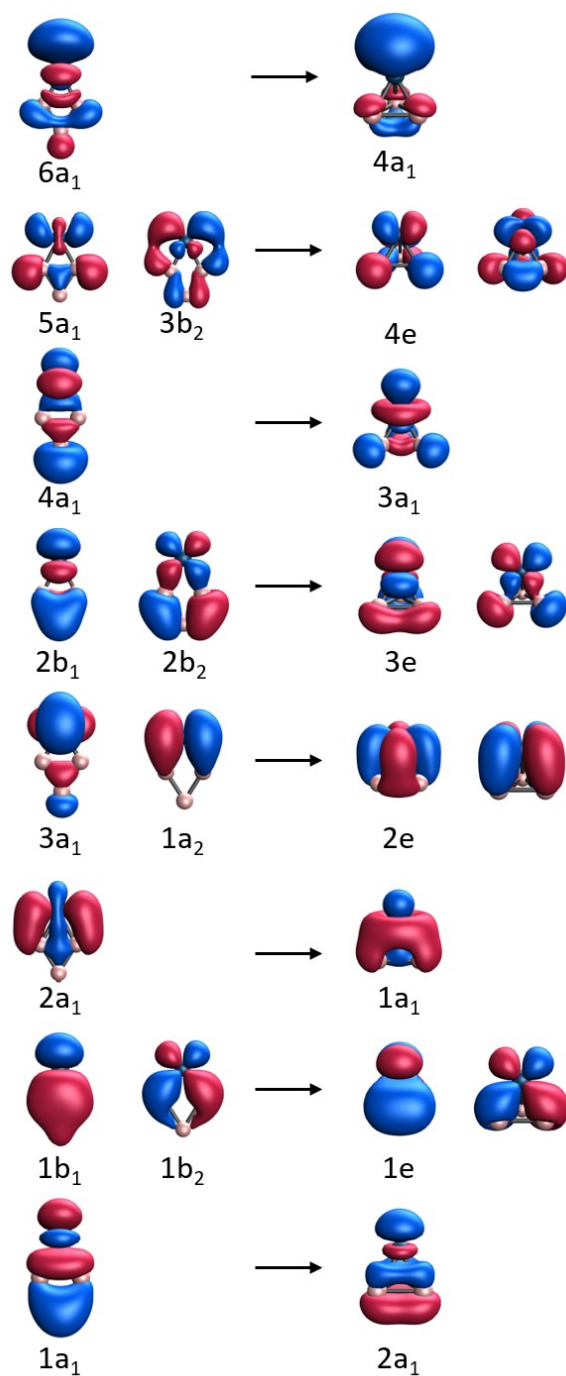

**Fig. S20** The canonical molecular orbital correlation for the structural transformation of IrB<sub>3</sub> cluster from 2D (C<sub>2v</sub> symmetry) to 3D (C<sub>3v</sub> symmetry), corresponding to the energy-level correlation diagram in **Fig. 5b**.

**Table S9.** HOMO-LUMO Gap of the Isomers for MB<sub>3</sub> (M= La, Ta, Re, Ir) Clusters at the B3LYP Levels. The HOMO-LUMO Gaps for the Lowest-Lying Structures are Labeled in Bold Black Font.

| M in MB <sub>3</sub> | 2D /eV | 3D /eV      |
|----------------------|--------|-------------|
| Re                   | 0.98   | <b>2.57</b> |
| Ir                   | 1.32   | <b>3.83</b> |
